# Supplementary material for: Potential of Adult Endogenous Neural Stem/Progenitor Cells in the Spinal Cord to Contribute to Remyelination in Experimental Autoimmune Encephalomyelitis
Source: PubMed Central journal article supplement (PMC6769975; doi:10.3390/cells8091025), 2019-09-03
Supplement: cells-08-01025-s001.pdf [file cells-08-01025-s001.pdf]

**Supplementary Table 1.**  
**Clinical scores of individual mice after MOG immunization (N = 10)**

|       | No.1 | No.2 | No.3 | No.4 | No.5 | No.6 | No.7 | No.8 | No.9 | No.10 |
|-------|------|------|------|------|------|------|------|------|------|-------|
| Day0  | 0    | 0    | 0    | 0    | 0    | 0    | 0    | 0    | 0    | 0     |
| Day1  | 0    | 0    | 0    | 0    | 0    | 0    | 0    | 0    | 0    | 0     |
| Day2  | 0    | 0    | 0    | 0    | 0    | 0    | 0    | 0    | 0    | 0     |
| Day3  | 0    | 0    | 0    | 0    | 0    | 0    | 0    | 0    | 0    | 0     |
| Day4  | 0    | 0    | 0    | 0    | 0    | 0    | 0    | 0    | 0    | 0     |
| Day5  | 0    | 0    | 0    | 0    | 0    | 0    | 0    | 0    | 0    | 0     |
| Day6  | 0    | 0    | 0    | 0    | 0    | 0    | 0    | 0    | 0    | 0     |
| Day7  | 0    | 0    | 0    | 0    | 0    | 0    | 0    | 0    | 0    | 0     |
| Day8  | 0    | 0    | 0    | 0    | 0    | 0    | 0    | 0    | 0    | 0     |
| Day9  | 0    | 0    | 0    | 0    | 0    | 0    | 0    | 0    | 0    | 0     |
| Day10 | 0    | 0    | 0    | 0    | 0    | 0    | 0    | 0    | 0    | 0     |
| Day11 | 1    | 0    | 0    | 0    | 0.5  | 0    | 0    | 0    | 0    | 0     |
| Day12 | 3    | 1    | 0    | 0    | 1    | 0.5  | 0    | 0    | 1.5  | 1     |
| Day13 | 3    | 2    | 0    | 1.5  | 1    | 1.5  | 1.5  | 0    | 2    | 2     |
| Day14 | 3    | 2    | 0    | 2    | 2    | 2    | 1.5  | 1    | 3    | 2.5   |
| Day15 | 3    | 2    | 0.5  | 1.5  | 2.5  | 3    | 2    | 2    | 3    | 2     |
| Day16 | 3    | 2    | 1    | 1.5  | 2    | 3    | 2    | 3    | 3    | 2     |
| Day17 | 3    | 1.5  | 1    | 1.5  | 2    | 3    | 2    | 2.5  | 3    | 2     |
| Day18 | 3    | 1.5  | 1    | 1    | 1.5  | 2.5  | 2    | 1.5  | 2.5  | 1.5   |
| Day19 | 2.5  | 1    | 1    | 1.5  | 1.5  | 2    | 2.5  | 2    | 3    | 2     |
| Day20 | 2.5  | 1    | 1    | 1    | 2    | 2    | 2.5  | 1.5  | 3    | 2     |
| Day21 | 2    | 1.5  | 0.5  | 0.5  | 2    | 2    | 2    | 1    | 3    | 2     |
| Day22 | 2    | 1    | 0.5  | 1.5  | 2    | 1.5  | 1.5  | 1.5  | 3    | 2     |
| Day23 | 2    | 1    | 0.5  | 1    | 1    | 1    | 1.5  | 1    | 3    | 1.5   |
| Day24 | 3    | 0.5  | 0.5  | 3    | 1    | 1    | 2    | 1    | 3    | 1.5   |
| Day25 | 3    | 1    | 1    | 3    | 1    | 1    | 1.5  | 1    | 3    | 1.5   |
| Day26 | 3    | 0.5  | 1    | 3    | 1    | 1    | 2    | 0.5  | 3    | 1.5   |
| Day27 | 3    | 0.5  | 1    | 3    | 1    | 1    | 1.5  | 0.5  | 3    | 1.5   |
| Day28 | 3    | 0.5  | 1    | 1    | 1.5  | 0.5  | 1.5  | 1    | 3    | 0.5   |
| Day29 | 3    | 0.5  | 0.5  | 1    | 1.5  | 0.5  | 1.5  | 1    | 3    | 0.5   |
| Day30 | 3    | 0.5  | 0.5  | 1    | 1.5  | 1    | 2    | 1    | 3    | 1     |

|              |   |     |     |     |     |     |     |     |   |     |
|--------------|---|-----|-----|-----|-----|-----|-----|-----|---|-----|
| <b>Day31</b> | 3 | 0.5 | 0.5 | 1.5 | 1.5 | 1   | 1.5 | 1   | 3 | 0.5 |
| <b>Day32</b> | 3 | 0.5 | 0.5 | 1   | 1.5 | 1   | 1.5 | 1.5 | 3 | 0.5 |
| <b>Day33</b> | 3 | 1   | 0.5 | 1.5 | 1.5 | 1   | 1   | 1   | 3 | 1   |
| <b>Day34</b> | 3 | 0.5 | 0.5 | 1.5 | 2   | 1   | 1   | 1   | 3 | 1   |
| <b>Day35</b> | 3 | 0.5 | 0.5 | 2   | 2   | 1   | 1.5 | 1   | 3 | 1   |
| <b>Day36</b> | 3 | 0.5 | 0.5 | 2   | 2   | 1   | 1.5 | 1   | 3 | 1   |
| <b>Day37</b> | 3 | 0.5 | 0.5 | 2   | 1.5 | 1   | 1   | 1   | 3 | 1   |
| <b>Day38</b> | 3 | 0.5 | 1   | 2.5 | 1   | 1   | 1   | 1   | 3 | 1   |
| <b>Day39</b> | 3 | 0.5 | 1   | 2.5 | 1   | 0.5 | 1   | 1   | 3 | 0.5 |
| <b>Day40</b> | 3 | 0.5 | 1   | 2.5 | 1   | 1   | 1   | 1   | 3 | 1   |
| <b>Day41</b> | 3 | 0.5 | 1   | 2   | 1   | 1   | 1   | 1   | 3 | 1   |
| <b>Day42</b> | 3 | 0.5 | 1   | 2   | 0.5 | 1   | 1   | 1   | 3 | 0.5 |
| <b>Day43</b> | 3 | 0.5 | 1   | 1   | 1   | 0.5 | 0.5 | 1   | 3 | 0.5 |
| <b>Day44</b> | 3 | 0.5 | 0.5 | 1   | 1   | 0.5 | 1   | 1   | 3 | 0.5 |
| <b>Day45</b> | 3 | 0.5 | 1   | 1   | 0.5 | 0.5 | 0.5 | 0.5 | 3 | 0.5 |
| <b>Day46</b> | 3 | 0.5 | 0.5 | 0.5 | 0.5 | 0.5 | 0.5 | 0.5 | 3 | 0.5 |
| <b>Day47</b> | 3 | 0.5 | 0.5 | 0.5 | 0.5 | 0.5 | 0.5 | 0.5 | 3 | 0.5 |
| <b>Day48</b> | 3 | 0.5 | 1   | 0.5 | 0.5 | 0.5 | 0.5 | 0.5 | 3 | 0.5 |
| <b>Day49</b> | 3 | 0.5 | 1.5 | 0.5 | 0.5 | 0.5 | 0.5 | 0.5 | 3 | 0.5 |
| <b>Day50</b> | 3 | 0.5 | 3   | 0.5 | 0.5 | 0.5 | 0.5 | 0.5 | 3 | 0.5 |
| <b>Day51</b> | 3 | 0.5 | 3   | 0.5 | 0.5 | 0.5 | 0.5 | 0.5 | 3 | 0.5 |
| <b>Day52</b> | 3 | 0.5 | 3   | 0.5 | 0.5 | 0.5 | 0.5 | 0.5 | 3 | 0.5 |
| <b>Day53</b> | 3 | 0.5 | 3   | 1   | 0.5 | 0.5 | 1   | 1   | 3 | 0.5 |
| <b>Day54</b> | 3 | 0.5 | 2.5 | 0.5 | 0.5 | 0.5 | 0.5 | 1   | 3 | 0.5 |
| <b>Day55</b> | 3 | 0.5 | 3   | 0.5 | 0.5 | 0.5 | 0.5 | 1   | 3 | 0.5 |
| <b>Day56</b> | 3 | 0.5 | 3   | 0.5 | 0.5 | 0.5 | 0.5 | 0.5 | 3 | 0.5 |
